# Supplementary material for: Improved charge separation and transport efficiency in panchromatic-sensitized solar cells with co-sensitization of PbS/CdS/ZnS quantum dots and dye molecules
Source: Royal Society of Chemistry journal article supplement (doi:10.1039/c5ra27514h), 2016-01-01
Supplement: c5ra27514h1.pdf [file c5ra27514h1.pdf]

## Supplementary Material

### Improved charge separation and transport efficiency in panchromatic sensitized solar cells with co-sensitization of PbS/CdS/ZnS quantum dots and dye molecules

*Songping Luo, <sup>a, //</sup> Heping Shen, <sup>a, //</sup> Wei Hu, <sup>b</sup> Zhibo Yao, <sup>a</sup> Jianbao Li, <sup>a, c</sup> Dan Oron, <sup>d,\*</sup> Ning Wang, <sup>b,\*</sup> Hong Lin <sup>a,\*</sup>*

<sup>a</sup> State Key Laboratory of New Ceramics & Fine Processing, School of Materials  
Science and Engineering, Tsinghua University, Beijing 100084, China

<sup>b</sup> State Key Laboratory of Electronic Thin Films and Integrated Devices, University of  
Electronic Science and Technology of China, Chengdu 610054, China

<sup>c</sup> Key Laboratory of Ministry of Education for Application Technology of Chemical  
Materials in Hainan Superior Resources, College of Materials Science and Chemical  
Engineering, Hainan University, Hainan 570228, China

<sup>d</sup> Department of Physics of Complex Systems, Weizmann Institute of Science,  
Rehovot 76100, Israel

**\*Corresponding Author:** hong-lin@tsinghua.edu.cn or dan.aron@weizmann.ac.il or  
ning\_wang@uestc.edu.cn

**Author Contributions:** // These authors contributed equally to this work.

## Supplementary Material

### 1. Electrochemical impedance spectroscopy (EIS)

Electrochemical Impedance Spectroscopy (EIS) was obtained using a CHI650C Electrochemical Workstation (Shanghai Chenhua, China) under dark with a magnitude of the modulation signal of 5 mV, ranging from 1 MHz to 0.1 mHz. The spectra were fitted by Z-View software in terms of appropriate equivalent circuits.

Impedance spectroscopy measured in the dark is a well-known technique to study the charge-transfer processes of solar cells. In general, Nyquist plots consist of three semicircles, with the leftmost one occurring at high frequencies and representing the redox charge transfer at the interface between platinum counter electrode and electrolyte, the middle one at intermediate frequencies representing recombination at the  $\text{TiO}_2$ /electrolyte interface via which recombination resistance can be read through the diameter, and the rightmost one at low frequencies reflecting ion diffusion in the electrolyte,<sup>1, 2</sup> In EIS spectra, the rightmost one often overlaps with the mid-frequency peak. EIS can give recombination resistance ( $R_{\text{ct}}$ ), which equals nearly to the diameter of the second semicircle. Nearly two semicircles were observed from Fig. S1. As can be seen, the second semicircle's diameter of the Nyquist plot from  $\text{TiO}_2/\text{PbS}/\text{CdS}/\text{ZnS}/\text{N719}$  based solar cells is much larger than that from  $\text{TiO}_2/\text{PbS}/\text{CdS}/\text{ZnS}$  based solar cells, which means the recombination was depressed by co-sensitization with dye N719.

## Supplementary Material

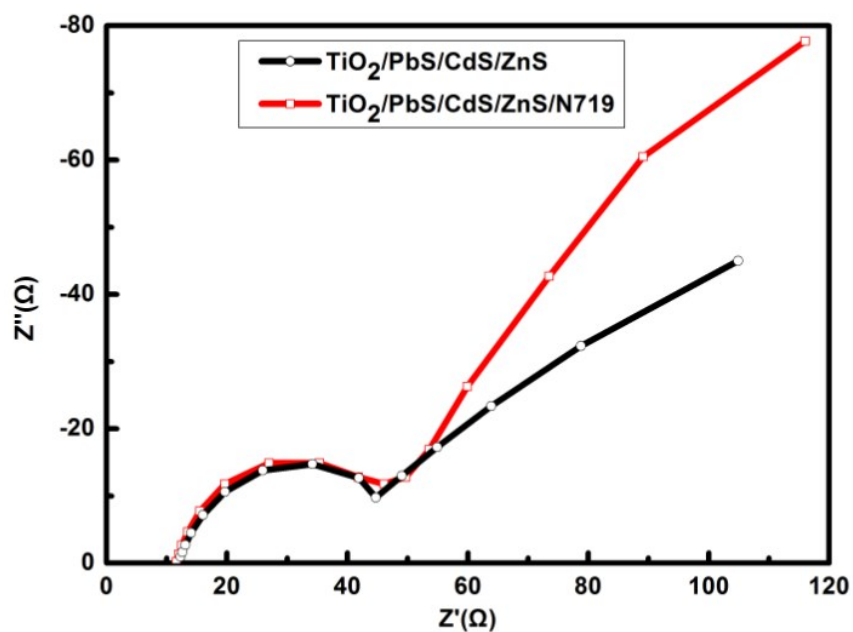

**Figure S1.** Typical electrochemical impedance spectra of cells in the forms of Nyquist plots. The spectra were measured with an external potential of -0.7V in the dark.

### References

1. J. Bisquert, Phys. Chem. Chem. Phys., 2000, 2, 4185-4192.
2. J. Bisquert, J. Phys. Chem. C, 2002, 106, 325-333.
